# Supplementary material for: Performance of testers with contrasting provitamin A content to evaluate provitamin A maize for resistance to Aspergillus flavus infection and aflatoxin production
Source: Front Plant Sci. 2023 May 10;14:1167628. doi: 10.3389/fpls.2023.1167628 (PMC10206313; doi:10.3389/fpls.2023.1167628)
Supplement: Supplementary file 3 [file Table_3.xlsx]

## Sheet: Suppl Table 3
Supplementary Table S3: Mean spores production, aflatoxin content and provitamin A and other carotenoids of testcrosses of 60 PVA inbred lines and checks evaluated across environements
Hybrids	Aflatoxin (ppb)	Nº.Spores	Lutein (µg/g)	Zeaxanthin (µg/g)	β-Cryptoxanthin (µg/g)	α-Carotene (µg/g)	β-Carotene (µg/g)	Provitamin A (µg/g)
TZI1276xT1	4.45S	2.2T	7.6675	5.7312	2.56125	1.03625	11.3412	13.14H
TZI1278xT1	4.4S	2.18T	8.1175	9.23	3.77625	0.8525	10.6612	12.97H
TZI1279xT1	4.89T	2.5MT	6.52	7.3462	3.06875	0.775	10.0762	11.99H
TZI1281xT1	4.61S	2.26MT	11.235	9.7587	2.97375	0.8675	9.8475	11.77M
TZI1282xT1	4.55T	2.33S	9.0675	8.3275	3.13875	0.71875	8.5112	10.44M
TZI1289xT1	4.11MT	2.41S	8.3837	9.6262	3.19	0.6825	7.1062	9.04M
TZI1296-1xT1	4.29T	2.07MT	5.6587	11.2612	4.05	0.79875	9.8437	12.26H
TZI1296-2xT1	4.83MT	2.42MT	5.61	9.7875	4.90125	1.22625	9.0837	12.14H
TZI1297xT1	4.8MT	2.2S	7.345	7.33	4.26875	0.86625	10.1	12.66H
TZI1299xT1	4.52MT	2.24T	7.865	7.3725	4.54375	0.89125	10.8862	13.6H
TZI1302-1xT1	5.12S	2.33MT	7.49	8.3412	4.1675	0.7575	9.68	12.14H
TZI1302-2xT1	4.59S	2.15T	9.02	7.3025	3.9875	0.84375	10.105	12.52H
TZI1304xT1	5.05S	2.2MT	6.7925	12.6962	5.83625	1.0825	10.13	13.59H
TZI1305xT1	4.65MT	2.53S	8.5125	9.5825	4.2925	0.92	10.415	13.02H
TZI1310-1xT1	4.46T	2.28MT	9.215	9.45	3.635	0.72125	10.8912	13.07H
TZI1310-2xT1	4.69T	2.18T	7.8812	9.6512	3.95125	0.82125	11.1375	13.52H
TZI1312xT1	4.45MT	2.56S	10.6825	6.8125	3.96	0.80125	8.3387	10.72M
TZI1314-1xT1	4.77MT	2.46T	6.3975	8.97	4.0225	0.875	9.7987	12.24H
TZI1314-2xT1	4.69S	2.37MT	5.2275	15.395	4.82375	0.8575	6.8162	9.65M
TZI1653xT1	4.64T	2.33T	10.5612	5.965	2.88875	0.88625	16.1375	18.02H
TZI1715xT1	4.57T	2.22MT	4.5675	4.415	2.10875	0.66375	16.4687	17.85H
TZI2004xT1	4.14MT	2.34MT	7.0875	6.7025	2.2975	0.53625	9.0012	10.41M
TZI2005-1xT1	4.47MT	2.14T	8.8675	7.765	3.48125	0.76375	9.41	11.53M
TZI2005-2xT1	4.39T	2.23T	10.8562	9.5075	4.005	0.8275	8.6112	11.02M
TZI2005-3xT1	4.32T	2.29S	7.2837	6.5312	3.56625	0.81125	10.6262	12.81H
TZI2006xT1	4.76MT	2.17MT	7.0687	5.1512	2.86125	0.7625	12.5037	14.31H
TZI2012-1xT1	4.77T	2.43MT	7.2887	4.3412	3.78875	0.8275	11.1025	13.41H
TZI2012-2xT1	4.95S	2.36MT	8.4187	4.9037	3.51625	0.945	13.13	15.36H
TZI2015xT1	4.13S	2.24MT	9.285	6.84	3.2825	0.74125	6.4137	8.42M
TZI2019xT1	4.7MT	2.19T	8.7062	6.7487	3.795	0.80375	9.075	11.37M
TZI2020xT1	4.89S	2.3T	11.1787	10.245	4.4425	0.89375	9.1125	11.78M
TZI2024xT1	4.68S	2.14MT	7.9437	6.3612	3.155	0.8925	11.0362	13.05H
TZI2025xT1	4.56T	2.52MT	7.5087	3.4112	1.95	0.63625	13.7062	15H
TZI2026-1xT1	4.81MT	2.31MT	8.03	9.5362	3.245	0.66125	8.3637	10.31M
TZI2026-2xT1	4.43MT	2.27T	6.8587	8.5637	3.36875	0.81625	8.1262	10.22M
TZI2026-3xT1	4.67S	2.33T	8.3525	8.6337	3.47	0.7275	8.9412	11.04M
TZI2028-1xT1	4.66S	2.53MT	10.3012	8.1775	3.405	0.805	9.7687	11.87M
TZI2028-2xT1	5.18S	2.53S	9.9362	6.9787	3.735	0.77125	9.2112	11.46M
TZI2029xT1	4.78MT	2.44S	12.2462	6.6875	3.08625	0.675	9.3037	11.18M
TZI2032xT1	4.88S	2.48MT	6.81	9.625	3.83	0.8575	10.5562	12.89H
TZI2037xT1	4.42S	2.55S	6.91	5.2962	1.92375	0.5075	10.4487	11.66M
TZI2038xT1	4.7MT	2.42S	15.7687	5.8987	3.2275	0.85875	9.3612	11.4M
TZI2040xT1	4.15MT	2.28S	11.8787	9.4425	5.165	0.99125	9.1875	12.26H
TZI2046xT1	5.13S	2.25S	6.1012	9.9125	4.40875	0.87625	9.0675	11.71M
TZI2065-1xT1	4.58S	2.34S	8.6487	5.3	2.3875	0.555	8.945	10.41M
TZI2065-2xT1	4.64T	2.24T	5.8512	3.8187	1.78125	0.54	13.7837	14.94H
TZI2066-1xT1	4.74S	2.35T	9.5675	4.61	2.225	0.765	13.77	15.26H
TZI2066-2xT1	3.94MT	2T	7.9787	4.7337	2.3725	0.61125	12.8637	14.35H
TZI2068xT1	4.15T	2.33T	9.63	7.405	2.69	0.655	8.8837	10.55M
TZI2071xT1	3.97T	2.17MT	10.8175	5.2887	2.4025	0.825	12.7162	14.32H
TZI2116xT1	4.73MT	2.28MT	7.5725	6.1537	2.465	0.70125	16.835	18.41H
TZI2117xT1	4.02T	2.55T	13.0167	5.5312	1.555	0.64875	11.6337	12.73H
TZI2130xT1	4.6T	2.36MT	19.4625	4.4587	1.4875	0.5875	12.92	13.95H
TZI2142-1xT1	4.4MT	2.47S	5.8625	8.295	3.86875	0.8225	10.2262	12.57H
TZI2142-2xT1	4.77T	2.39MT	6.305	6.155	2.39375	0.725	12.935	14.49H
TZI2156xT1	4.81S	2.52S	11.4237	9.65	3.0325	0.7425	10.7375	12.62H
TZI2161xT1	4.56S	2.35T	8.9487	8.4925	4.5225	0.93125	10.0087	12.73H
TZI2163-1xT1	4.82MT	2.49T	6.775	5.525	2.36875	0.65625	10.795	12.3H
TZI2163-2xT1	4.82T	2.18T	6.8962	4.5775	2.4625	0.69625	13.0062	14.58H
TZI2182xT1	4T	2.24T	4.3182	1.7775	1.35875	0.52	15.9225	16.86H
TZI1276xT2	5.22S	2.22S	4.8412	11.4337	3.56	0.70625	7.0762	9.2M
TZI1278xT2	4.81MT	2.05T	5.2712	14.5237	5.8475	1.0625	8.605	12.06H
TZI1279xT2	5.11MT	2.21T	6.445	12.6312	4.76875	0.855	7.2712	10.08M
TZI1281xT2	4.72S	2.24S	7.9262	15.9325	3.66875	0.75125	6.5862	8.79M
TZI1282xT2	4.92S	2.41S	6.0062	11.7212	3.305	0.84	5.5637	7.63L
TZI1289xT2	4.93MT	2.47MT	5.3562	13.58	3.4775	0.58375	4.1637	6.19L
TZI1296-1xT2	5.07MT	2.23MT	4.5912	14.2612	5.01125	0.8225	6.9225	9.83M
TZI1296-2xT2	5T	2.45T	5.1987	11.9337	5.5825	1.02125	7.0512	10.35M
TZI1297xT2	5.08T	2.44MT	7.2937	13.1112	5.82625	1.005	7.5512	10.96M
TZI1299xT2	5.2T	2.16MT	7.8062	13.7937	6.34	1.0825	8.0025	11.71M
TZI1302-1xT2	4.97S	2.38MT	5.3812	13.4912	5.75875	0.81	7.0137	10.29M
TZI1302-2xT2	5.44S	2.28T	5.31	11.8262	6.7475	1.08375	6.4737	10.39M
TZI1304xT2	4.97MT	2.13T	6.8425	17.705	6.34375	0.88375	7.6825	11.29M
TZI1305xT2	5.13S	2.3MT	5.2925	12.2537	4.88875	0.83125	7.3737	10.23M
TZI1310-1xT2	5.02MT	2.29T	8.0562	16.4762	5.6575	0.95875	7.785	11.09M
TZI1310-2xT2	4.71S	2.34S	7.6287	15.48	5.555	1.1	7.5412	10.86M
TZI1312xT2	5.31S	2.5MT	7.0225	12.7862	5.84375	1.29	8.0075	11.57M
TZI1314-1xT2	5.05MT	2.45S	5.5587	9.8437	5.62875	1.0475	8.8562	12.19H
TZI1314-2xT2	4.73T	1.93T	4.9387	16.7275	6.2075	1.1375	7.5137	11.18M
TZI1653xT2	4.98S	2.28MT	14.9175	12.3112	5.14875	0.9725	9.1212	12.18H
TZI1715xT2	4.43MT	2.12T	5.2962	10.5787	4.42875	0.92375	12.3975	15.07H
TZI2004xT2	4.4MT	2.01MT	6.3175	10.14	3.6	0.72	7.1925	9.35M
TZI2005-1xT2	5.05T	2.22MT	9.2612	13.7987	5.02	0.83375	6.105	9.03M
TZI2005-2xT2	4.9S	2.27S	7.705	15.02	5.66875	0.965	6.7887	10.1M
TZI2005-3xT2	4.5T	2.21T	7.1662	13.2312	4.70875	1.07125	8.185	11.07M
TZI2006xT2	4.46S	2.22MT	5.8387	6.8025	4.06625	0.81625	7.7375	10.18M
TZI2012-1xT2	5.36S	2.47S	6.3062	7.85	5.07	1.05125	7.5775	10.64M
TZI2012-2xT2	4.95S	2.46S	9.0737	8.97	5.33375	0.99375	8.53	11.69M
TZI2015xT2	5.02S	2.15MT	8.6487	10.9275	3.765	0.585	5.3575	7.52L
TZI2019xT2	4.36T	2.08MT	7.8675	10.7812	4.895	1.11625	7.7037	10.7M
TZI2020xT2	5.12S	2.23T	8.215	12.4062	4.665	0.735	5.31	8.01L
TZI2024xT2	4.36S	2.37S	6.5912	10.2612	3.615	0.71625	7.4775	9.64M
TZI2025xT2	4.73S	2.29MT	6.4525	7.2637	3.0825	0.7025	9.5487	11.5M
TZI2026-1xT2	4.8S	2.23T	6.3375	14.2725	4.1875	0.8	5.8487	8.34M
TZI2026-2xT2	5.17S	2.12T	6.7962	14.9237	4.58625	0.9325	6.2062	8.96M
TZI2026-3xT2	5.17S	2.28T	6.44	13.0037	4.4125	0.85625	5.8025	8.43M
TZI2028-1xT2	5.48S	2.35MT	6.48	11.9762	5.15	1.09625	6.43	9.55M
TZI2028-2xT2	4.7S	2.19S	7.6512	12.1012	5.17125	0.9225	6.8625	9.9M
TZI2029xT2	4.92S	2.23S	7.0187	9.9175	3.815	0.7825	6.8525	9.15M
TZI2032xT2	4.51S	2.34MT	8.175	17.195	4.915	1.0675	7.3775	10.36M
TZI2037xT2	5.18S	2.25T	5.8862	9.4412	2.79375	0.53	6.9487	8.61M
TZI2038xT2	4.67T	2.42T	12.7075	7.0962	4.375	0.95	5.7012	8.36M
TZI2040xT2	4.64T	2.43MT	8.725	11.6637	5.88	1.48125	5.8362	9.51M
TZI2046xT2	5.55S	2.23T	5.0712	13.9987	5.84625	1.01	5.435	8.86M
TZI2065-1xT2	5.13T	2.3S	10.2575	9.4837	3.63	0.8475	8.7425	10.97M
TZI2065-2xT2	5.03S	2.2MT	8.495	11.7937	3.58375	0.69875	8.65	10.79M
TZI2066-1xT2	4.85S	2.21MT	8.6587	9.5262	3.70375	0.76625	10.2337	12.47H
TZI2066-2xT2	4.98MT	2.25MT	7.49	8.8925	3.75	0.82125	9.5687	11.85M
TZI2068xT2	4.43T	2.28T	9.225	9.075	2.4525	0.57875	6.6037	8.12M
TZI2071xT2	5.16MT	2.01T	9.04	10.5137	3.1075	0.77	9.61	11.55M
TZI2116xT2	4.86S	2.2T	6.605	11.9212	4.38375	0.94875	11.42	14.08H
TZI2117xT2	4.56MT	2.18T	13.8725	8.705	2.79125	0.665	7.1687	8.89M
TZI2130xT2	4.96S	2.4S	11.3125	9.9637	3.75	0.74625	8.0825	10.33M
TZI2142-1xT2	4.98S	2.28MT	4.3125	10.3962	5.1275	0.99125	6.7525	9.81M
TZI2142-2xT2	4.85S	2.26S	6.605	12.0037	4.11875	0.9325	8.2687	10.79M
TZI2156xT2	4.8S	2.31T	9.9325	14.0637	3.14625	0.60625	6.825	8.7M
TZI2161xT2	4.56S	2.2MT	7.3387	13.2725	6.89875	1.35625	7.7475	11.87M
TZI2163-1xT2	4.57MT	1.99T	5.64	9.3387	3.7675	0.8125	8.4225	10.71M
TZI2163-2xT2	4.73S	2.14T	6.1912	10.8912	3.95375	0.78125	8.1362	10.5M
TZI2182xT2	5.11MT	2.27S	6.3637	6.05	3.76625	0.67875	10.0225	12.24H
T1xT2	4.51T	2.41T	6.9462	5.8687	3.55625	0.71375	7.2575	9.39M
Ife Hybridx3	4.05MT	2.24T	6.5062	13.8	6.18375	1.18625	7.6112	11.29M
Ife Hybridx4	4.84S	2.2T	7.9637	11.8212	5.085	1.2	8.2162	11.35M
Oba Super 2	4.34T	2.02T	7.69	17.6137	3.2075	0.6825	3.9812	5.92L
Mean	4.74	2.29	7.9011	9.70825	3.97346	0.840353	9.01707	11.42
LSD	0.52	0.27	2.2316	2.3351	0.75525	0.3004	2.1573	2.26
Repeatability	0.59	0.21	0.8921	0.9422	0.95132	0.64705	0.9058	0.86
Nº. Spores in NTU: nephelometric turbidity unit (1 NTU = 49,937 spores), log10 transformed of the number of spores produced by Aspergillus flavus 3228-Tox
Aflatoxin= log10 transformed of the sum of the average total aflatoxin (B1, B2) produced by Aspergillus flavus 3228-Tox	Aflatoxin= log10 transformed of the sum of the average total aflatoxin (B1, B2) produced by Aspergillus flavus 3228-Tox
K-means classification: T= Tolerant to aflatoxin, spores; MT= Moderately Tolerant; S= Susceptible	K-means classification: T= Tolerant to aflatoxin, spores; MT= Moderatly Tolerant; S= Susceptible
H= High Provitamin A; M= Medium; L= Low
LSD= least significant difference	LSD= least significant difference
